# Supplementary material for: The fungal peptide toxin Candidalysin activates the NLRP3 inflammasome and causes cytolysis in mononuclear phagocytes
Source: PubMed Central journal article supplement (PMC6189146; doi:10.1038/s41467-018-06607-1), 2018-10-15
Supplement: 41467_2018_6607_MOESM1_ESM.pdf [file 41467_2018_6607_MOESM1_ESM.pdf]

## **Supplementary Information**

### **The fungal peptide toxin Candidalysin activates the NLRP3 inflammasome and causes cytolysis in mononuclear phagocytes**

Lydia Kasper, Annika König, Paul-Albert Koenig, Mark S. Gresnigt, Johannes Westman, Rebecca A. Drummond, Michail S. Lionakis, Olaf Groß, Jürgen Ruland, Julian R Naglik, and Bernhard Hube\*

\*Corresponding author: Bernhard Hube

E-mail: [bernhard.hube@leibniz-hki.de](mailto:bernhard.hube@leibniz-hki.de)

**a** related to figure 3b  
human MDMs, IL-1 $\beta$

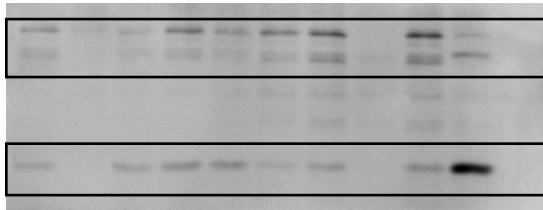

**b** related to figure 4c  
murine BMDMs, IL-1 $\beta$

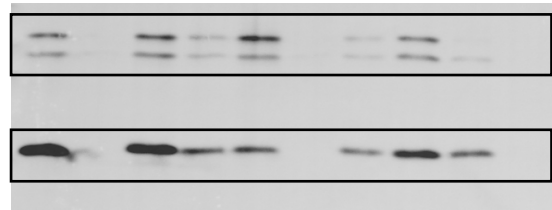

**c** related to figure 5e  
human MDMs, Caspase-1

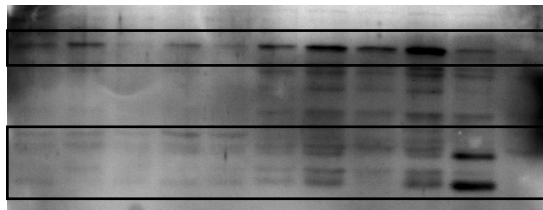

murine BMDMs, Caspase-1

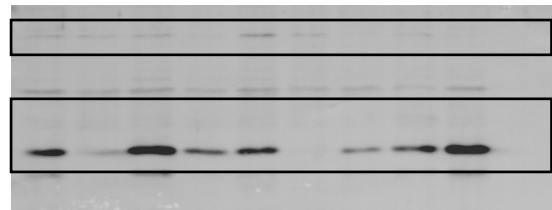

murine BMDCs, Caspase-1

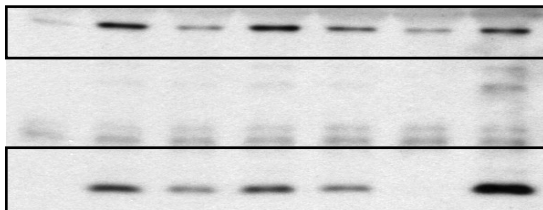

murine BMDCs, Caspase-1

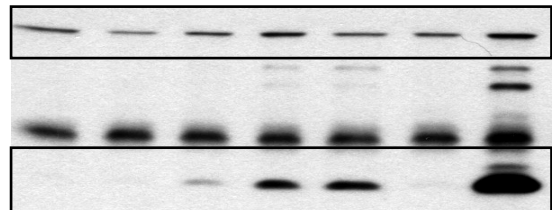

**Supplementary Figure 1:** Uncropped images of western blots shown in Fig. 3b (a), Fig. 4c (b) and Fig. 5e (c).
